# Supplementary material
Source: Springer Nature journal article supplement (https://www.springermedizin.de/resource/supplementary/12961_2009_218_MOESM2_ESM.pdf/9571684)

**Contextual factors**

**Community factors**  
Economic status  
Cohesiveness  
Status of women  
Civil society networks

**Health system factors**  
Responsiveness and accountability  
Capacity

**Governance factors**  
Decentralisation  
Responsiveness and accountability

**Maternal death inquiry and response process**

Engage health officials and sensitize the community

Community reports deaths

Interview all families with a maternal death

Analyze and interpret the data

Share and interpret the data with the community and take action

Monitor and revise interventions as needed

**Policy objectives**

Unhide maternal deaths

Evidence based planning

Decentralised planning

Bottom-up planning

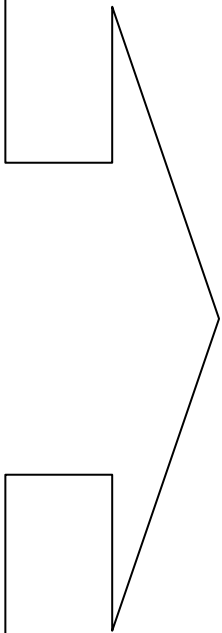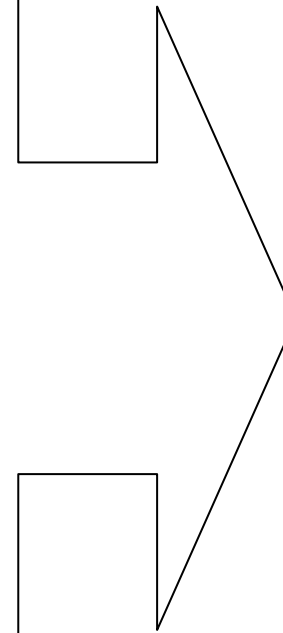

Supplement: MOESM2 [file 9571684]
